# Supplementary material
Source: Springer Nature journal article supplement (https://www.springermedizin.de/resource/supplementary/12936_2008_852_MOESM6_ESM.pdf/9548400)

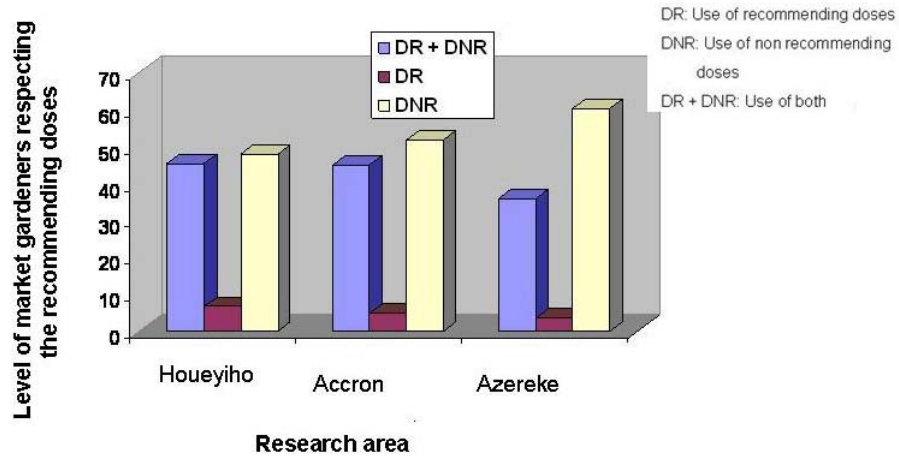

**Figure 8 :** Doses used by market gardeners at the three sites of the study (October 2005- december 2006)

Supplement: MOESM6 [file 9548400]
